# Supplementary material for: A novel double-perovskite Gd2ZnTiO6:Mn4+red phosphor for UV-based w-LEDs: structure and luminescence properties
Source: Royal Society of Chemistry journal article supplement (doi:10.1039/c6tc00313c), 2016-01-01
Supplement: c6tc00313c1.pdf [file c6tc00313c1.pdf]

## Supporting Information

### **A novel double-perovskite $Gd_2ZnTiO_6$ : $Mn^{4+}$ red phosphor for UV-based w-LEDs: structure and luminescent properties**

Hui Chen,<sup>ac</sup> Hang Lin\*,<sup>ab</sup> Qingming Huang,<sup>d</sup> Feng Huang,<sup>ab</sup> Ju Xu,<sup>ab</sup> Bo Wang,<sup>a</sup> Zebin Lin,<sup>a</sup> Jiangcong Zhou,<sup>a</sup> Yuansheng Wang\*<sup>ab</sup>

<sup>a</sup> Key Laboratory of Design and Assembly of Functional Nanostructures, Fujian Institute of Research on the Structure of Matter, Chinese Academy of Sciences; University of Chinese Academy of Sciences, Fuzhou, Fujian, 350002 (P. R. China)

<sup>b</sup> Fujian Provincial Key Laboratory of Nanomaterials, Fuzhou, Fujian, 350002 (P. R. China)

<sup>c</sup> College of Materials Science and Engineering, Fujian Normal University, Fuzhou, Fujian, 350007 (P. R. China)

<sup>d</sup> Instrumentation Analysis and Research Center, Fuzhou University, Fuzhou, Fujian, 350002 (P. R. China)

---

\*E-mail: [lingh@fjirsm.ac.cn](mailto:lingh@fjirsm.ac.cn); Tel/Fax: +86-591-83751401

\*E-mail: [ywang@fjirsm.ac.cn](mailto:ywang@fjirsm.ac.cn); Tel/Fax: +86-591-83705402

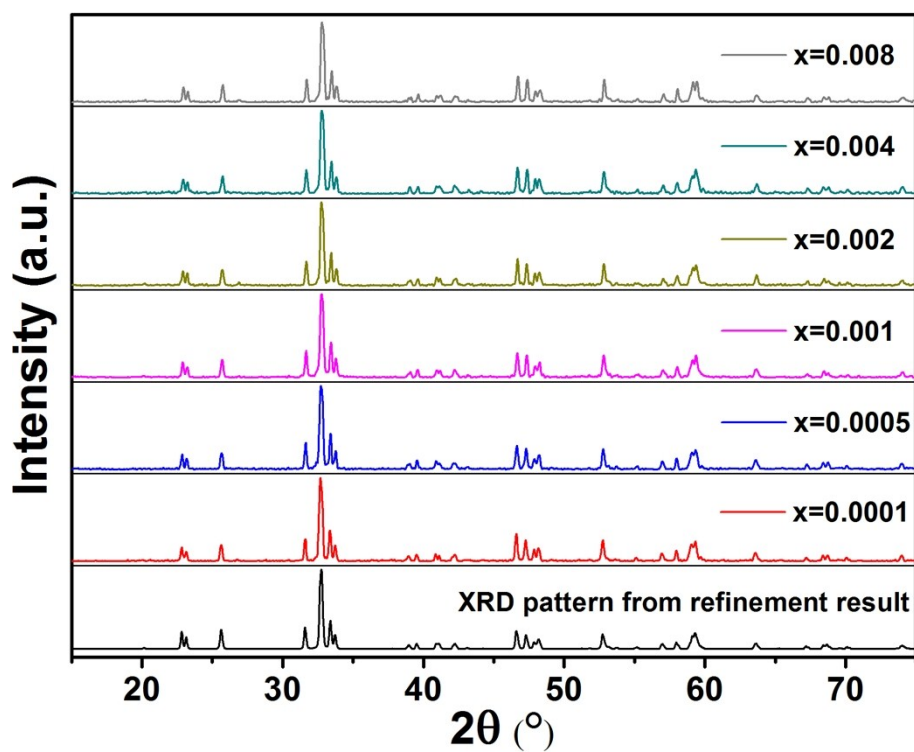

Figure S1. XRD patterns of GZT:  $x\text{Mn}^{4+}$  samples and the refinement result for GZT:  $0.002\text{Mn}^{4+}$ .

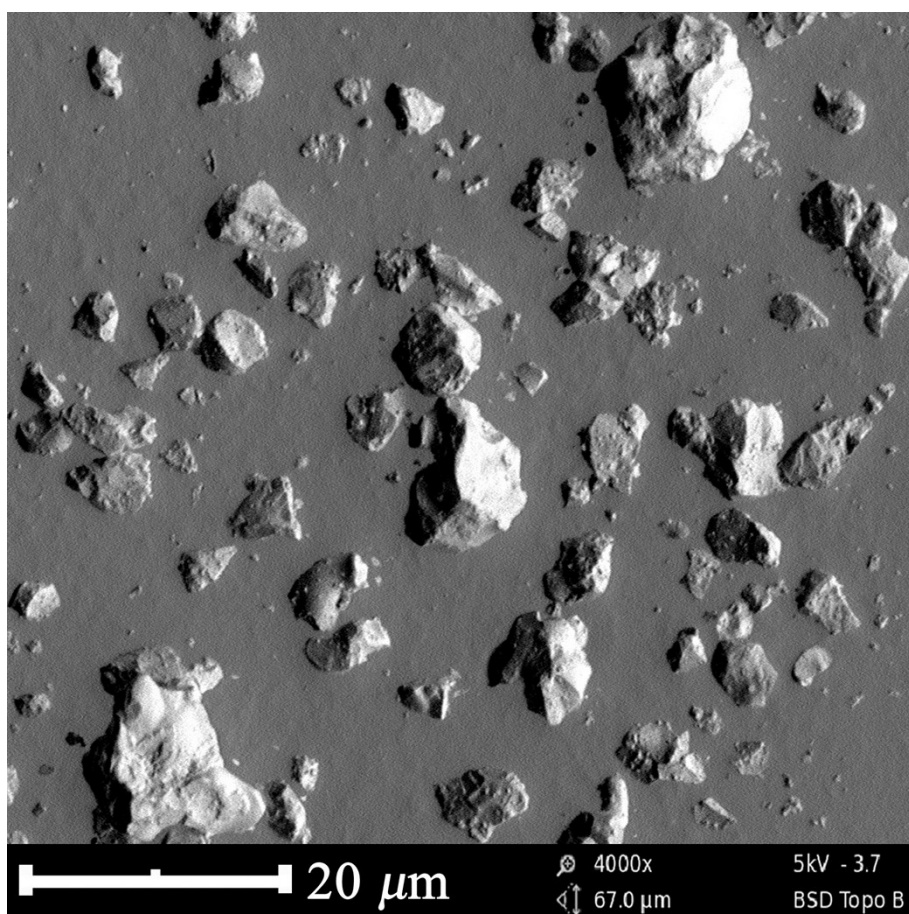

Figure S2. SEM image of GZT:  $0.002\text{Mn}^{4+}$  phosphor sample.

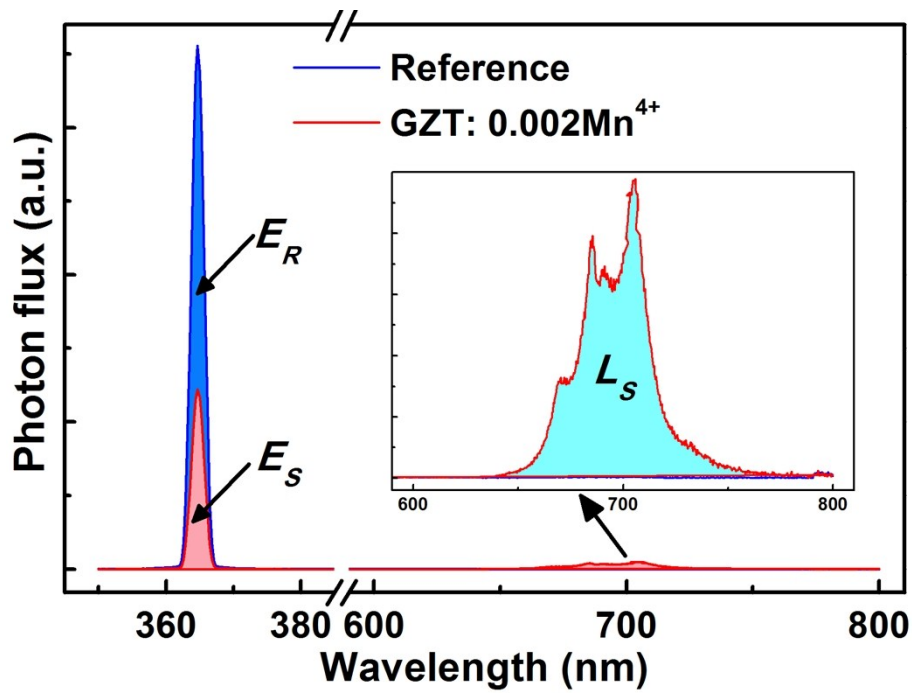

**Figure S3.** PL spectra of GZT:0.002Mn<sup>4+</sup> and reference sample recorded by a spectrofluorometer equipped with an integrating sphere for quantum efficiency and absorption efficiency calculations; the inset shows the magnified spectral region of 600–800 nm.

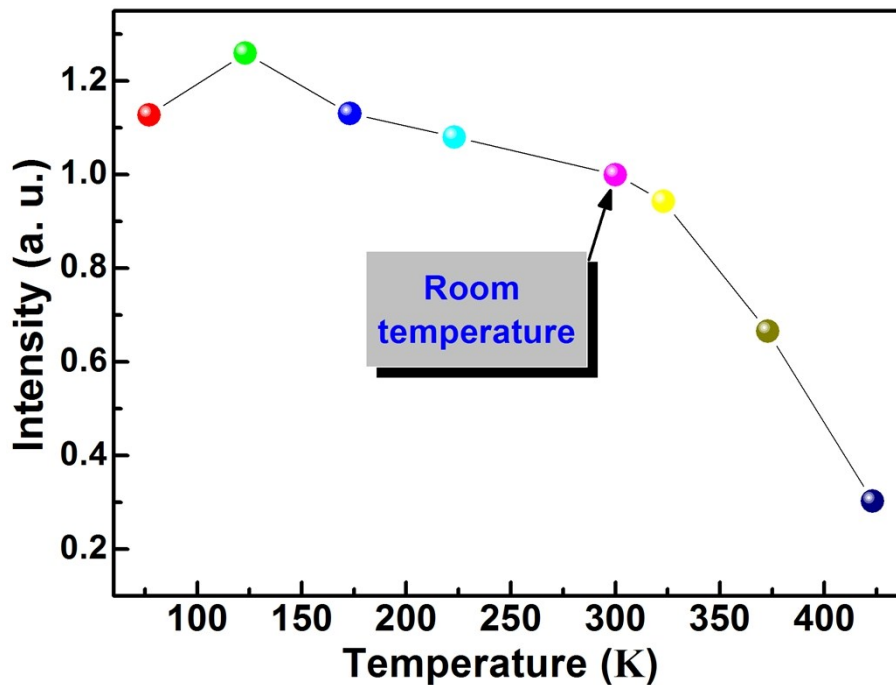

**Figure S4.** Integrated red PL intensity of GZT:0.002Mn<sup>4+</sup> as a function of temperature

**Table S1.** The crystal field splitting ( $D_q$ ), Racah parameters ( $B$ ,  $C$ ), Nephelauxetic ratio ( $\beta$ ) and  ${}^2E$  energy level ( $E({}^2E)$ ) of  $Mn^{4+}$  ion in various hosts

| Host                       | $D_q$<br>( $cm^{-1}$ ) | $B$ ,<br>( $cm^{-1}$ ) | $C$ ,<br>( $cm^{-1}$ ) | $\beta$ | $E({}^2E)$ ,<br>( $cm^{-1}$ ) | Reference |
|----------------------------|------------------------|------------------------|------------------------|---------|-------------------------------|-----------|
| $Na_2SiF_6$                | 2174                   | 775                    | 3475                   | 1.051   | 16210                         | 1         |
| $Na_2SnF_6$                | 2101                   | 589                    | 3873                   | 1.033   | 16171                         | 2         |
| $K_2MnF_6$                 | 2183                   | 604                    | 3821                   | 1.029   | 16129                         | 3         |
| $K_2TiF_6$                 | 2137                   | 582                    | 3778                   | 1.011   | 15835                         | 4         |
| $Cs_2GeF_6$                | 2063                   | 490                    | 4056                   | 1.033   | 16032                         | 5         |
| $BaSiF_6$                  | 2141                   | 568                    | 3879                   | 1.026   | 16050                         | 6         |
| MMG*                       | 2380                   | 700                    | 3416                   | 0.997   | 15576                         | 7         |
| $Y_2Sn_2O_7$               | 2100                   | 700                    | 3515                   | 1.016   | 15563                         | 8         |
| $CaAl_{12}O_{19}$          | 2132                   | 807                    | 3088                   | 0.999   | 15244                         | 9-10      |
| $SrMgAl_{10}O_{17}$        | 2237                   | 791                    | 3084                   | 0.989   | 15152                         | 11        |
| $Sr_4Al_{14}O_{25}$        | 2222                   | 680                    | 3397                   | 0.983   | 15361                         | 12-14     |
| $Ba_2LaNbO_6$              | 1780                   | 670                    | 3290                   | 0.958   | 14679                         | 15        |
| $Y_3Ga_5O_{12}$            | 1922                   | 699                    | 3197                   | 0.957   | 14859                         | 16        |
| $Mg_{14}Ge_5O_{24}$        | 2375                   | 709                    | 3263                   | 0.974   | 15175                         | 16        |
| $CaZrO_3$                  | 1850                   | 754                    | 3173                   | 0.983   | 15054                         | 17        |
| $Mg_2TiO_4$                | 2096                   | 700                    | 3348                   | 0.985   | 15267                         | 18        |
| $Ca_{14}Zn_6Al_{10}O_{35}$ | 2165                   | 654                    | 3054                   | 0.906   | 14451                         | 19-20     |
| $LaAlO_3$                  | 2123                   | 695                    | 2941                   | 0.907   | 14034                         | 21        |
| $BaTiO_3$                  | 1780                   | 738                    | 2820                   | 0.913   | 13862                         | 22        |
| $SrTiO_3$                  | 1818                   | 719                    | 2839                   | 0.905   | 13827                         | 23        |
| $Gd_2ZnTiO_6$              | 1980                   | 639                    | 3132                   | 0.913   | 14224                         | this work |

MMG\*= $3.5MgO \cdot 0.5MgF_2 \cdot GeO_2$

## References

1. Y. K. Xu and S. Adachi, *J. Appl. Phys.*, 2009, **105**, 013525 1–6.
2. Y. Arai and S. Adachi, *J. Lumin.*, 2011, **131**, 2652–2660.
3. R. Kasa, Y. Arai, T. Takahashi and S. Adachi, *J. Appl. Phys.*, 2010, **108**, 113503 1–6.
4. H. M. Zhu, C. C. Lin, W. Luo, S. T. Shu, Z. G. Liu, M. Wang, J. T. Kong, E. Ma, Y. Cao, R. S. Liu and X. Y. Chen, *Nat. Commun.*, 2014, **5**, 4312 1–10.
5. E. Lifshitz and A. H. Francis, *Chem. Phys.*, 1988, **127**, 297–304.
6. D. Sekiguchi, J. I. Nara and S. Adachi, *J. Appl. Phys.*, 2013, **113**, 183516 1–6.
7. Q. Y. Shao, H. Y. Lin, J. L. Hu, Y. Dong and J. Q. Jiang, *J. Alloys. Compd.*,

- 2013, **552**, 370–375.
8. M. G. Brik, A. M. Srivastava, N. M. Avram, *Opt. Mater.*, 2011, **33**, 1671–1676.
  9. T. Murata, T. Tanoue, M. Iwasaki, K. Morinaga, T. Hase, *J. Lumin.*, 2005, **114**, 207–212.
  10. Y. X. Pan and G. K. Liu, *Opt. Lett.*, 2008, **33**, 1816–1818.
  11. L. L. Meng, L. F. Liang and Y. X. Wen, *J. Mater. Sci.: Mater. Electron.*, 2014, **25**, 2676–2681.
  12. Y. D. Xu, D. Wang, L. Wang, N. Ding, M. Shi, J. G. Zhong and S. Qi, *J. Alloys. Compd.*, 2013, **550**, 226–230.
  13. M. Y. Peng, X. W. Yin, P. A. Tanner, C. Q. Liang, P. F. Li, Q. Y. Zhang and J. R. Qiu, *J. Am. Ceram. Soc.*, 2013, **96**, 2870–2876.
  14. M. Y. Peng, X. W. Yin, P. A. Tanner, M. G. Brik and P. F. Li, *Chem. Mater.*, 2015, **27**, 2938–2945.
  15. A. M. Srivastava and M. G. Brik, *J. Lumin.*, 2012, **132**, 579–584.
  16. T. M. Chen, J. T. Luo, *U. S. Patent No. 7, 846, 350*, 2010.
  17. M. G. Brik and A. M. Srivastava, *ECS J. Solid State Sci. Technol.*, 2013, **2**, R148–R152.
  18. J. Stade, D. Hahn and R. Dittmann, *J. Lumin.*, 1974, **8**, 318–325.
  19. K. Seki, K. Uematsu, K. Toda and M. Sato, *Chem. Lett.*, 2014, **43**, 1213–1215.
  20. W. Lv, W. Z. Lv, Q. Zhao, M. M. Jiao, B. Q. Shao and H. P. You, *Inorg. Chem.*, 2014, **53**, 11985–11990.
  21. A. M. Srivastava and M. G. Brik, *Opt. Mater.*, 2013, **35**, 1544–1548.
  22. X. X. Wu, W. Fang, W. L. Feng and W. C. Zheng, *Pramana – J. Phys.*, 2009, **72**, 569–574.
  23. Z. Brykhar, V. Trepakov, Z. Potucek, L. Jastrabík, *J. Lumin.*, 2000, **87**, 605–607.
